# Supplementary material
Source: publisher figshare collection journal article supplement (https://acs.figshare.com/ndownloader/files/4096255)
Supplement: Supplementary file 1 [file 4096255]

# Supporting Information

## Self-Assembly Solid-State Enhanced Red Emission of Quinolinemalononitrile: Optical Waveguides and Stimuli-Response

Chuanxing Shi,<sup>†,‡</sup> Zhiqian Guo,<sup>†,‡</sup> Yongli Yan,<sup>§</sup> Shiqin Zhu,<sup>‡</sup> Yongshu Xie,<sup>‡</sup> Yong Sheng Zhao,<sup>\*,§</sup> Weihong Zhu,<sup>\*,‡</sup> and He Tian<sup>‡</sup>

<sup>†</sup>Shanghai Key Laboratory of Functional Materials Chemistry, Key Laboratory for Advanced Materials and Institute of Fine Chemicals, East China University of Science and Technology, Shanghai 200237, P. R. China. Fax: (+86) 21-6425-2758. E-mail: [whzhu@ecust.edu.cn](mailto:whzhu@ecust.edu.cn)

<sup>§</sup>Beijing National Laboratory for Molecular Sciences (BNLMS), Key Laboratory of Photochemistry and Institute of Chemistry, Chinese Academy of Sciences, Beijing 100190, P. R. China. Fax: (+86) 10-6265-2029. E-mail: [yszhaoy@iccas.ac.cn](mailto:yszhaoy@iccas.ac.cn)

### Contents:

1. Synthesis of ED and BD
2. Absorption, photoluminescence spectra, and SEM image of ED
3. Photographic images, absorption and photoluminescence spectra of BD
4. Solvent effect
5. The DFT calculation for BD and ED
6. Crystallographic data
7. Stimuli-responsive section
8. Cell imaging
9. Characterization of compounds ED and BD

## 1. Synthesis of ED and BD

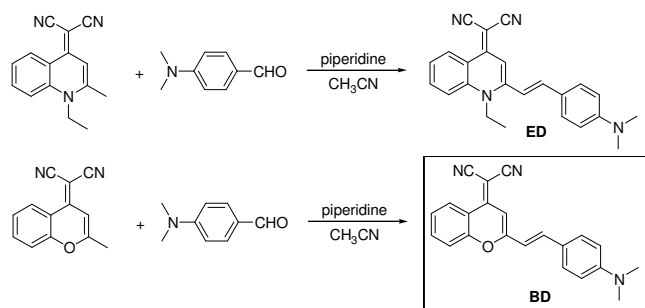

**Scheme S1** Synthetic route of **ED** and **BD**

The intermediate of 1-ethyl-2-methyl-4-(dicyanomethylene)-1,4-dihydroquinoline was prepared by the literature procedure (Horwitz, L., *J. Am. Chem. Soc.*, 1955, 77, 1687). Another intermediate of 2-(2-methyl-4H-chromen-4-ylidene)malononitrile was prepared by the established literature procedure (G. G. Badcock, F. M. Dean, A. Robertson and W. B. Whalley, *J. Chem. Soc.*, 1950, 903).

## 2. Absorption, photoluminescence spectra, and SEM image of ED

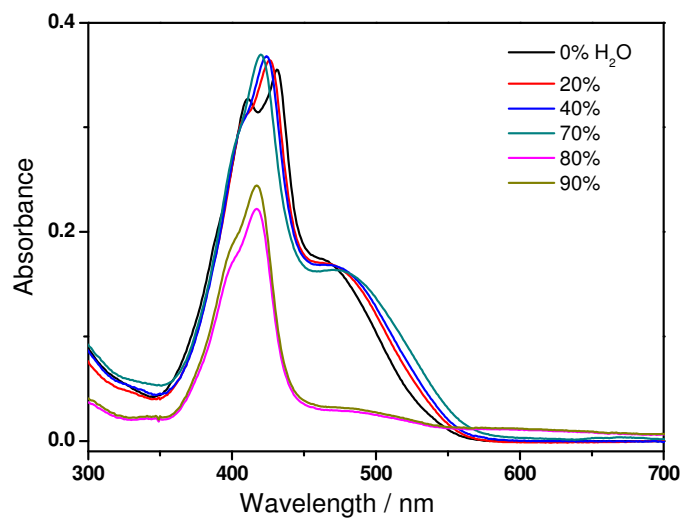

**Figure S1.** UV/visible absorption spectra of **ED** ( $10^{-5}$  M) in H<sub>2</sub>O/THF mixtures with different volume fractions of water. Note: the absorption of the resultant solution was determined after 12 h.

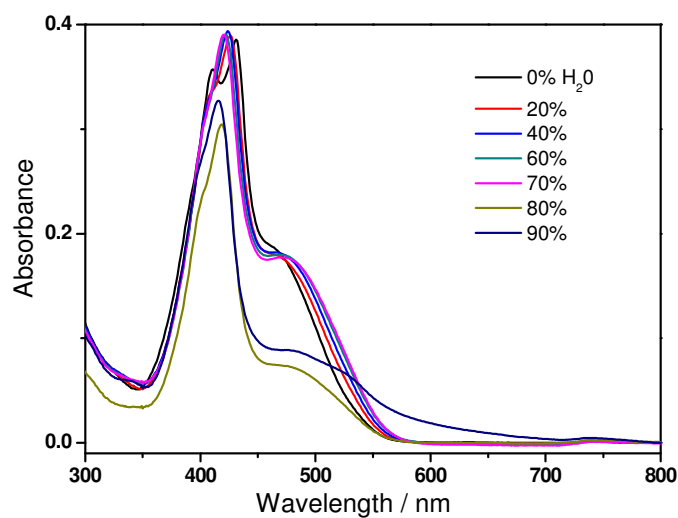

**Figure S2.** UV/visible absorption spectra of freshly prepared **ED** ( $10^{-5}$  M) in H<sub>2</sub>O/THF mixtures with different volume fractions of water. Note: the absorption of the resultant solution was determined immediately.

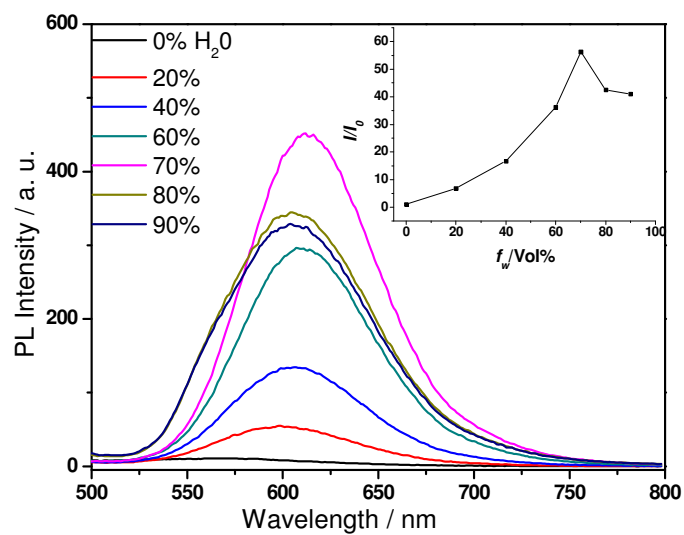

**Figure S3.** Emission spectra of freshly prepared **ED** ( $10^{-5}$  M) in  $\text{H}_2\text{O}/\text{THF}$  mixtures with different volume fractions of water.  $\lambda_{\text{ex}} = 430$  nm. Inset: plot of relative PL intensity against water content ( $f_w$ ). Note: the emission spectra of the resultant solution was determined immediately.

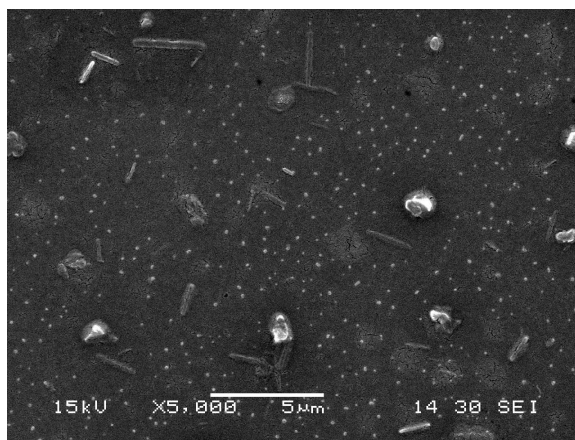

**Figure S4.** SEM image of random agglomerates obtained from **ED** suspension (80%  $\text{H}_2\text{O}$ ).

### 3. Photographic images, absorption and photoluminescence spectra of **BD**

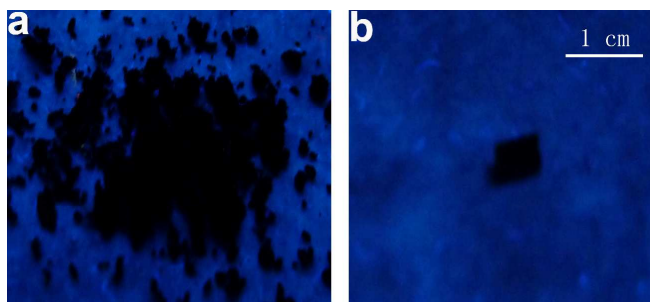

**Figure S5.** Photographic images of powder and crystal for compound **BD** under 365 nm UV light illumination, showing severe ACQ effect with little fluorescence. Scale bar: 1 cm.

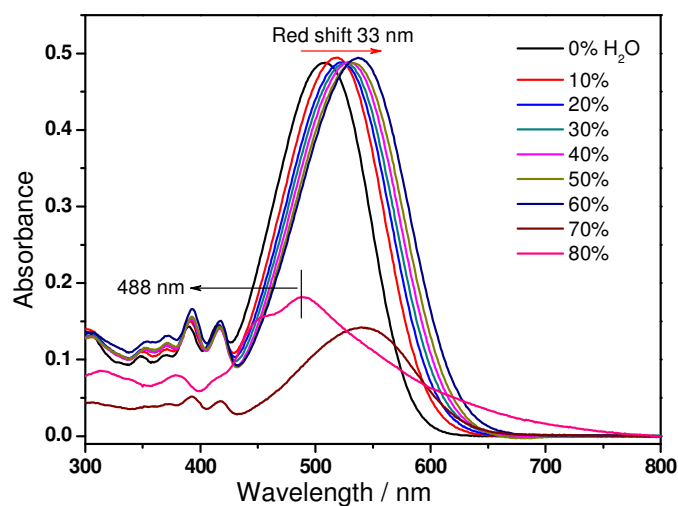

**Figure S6.** UV/visible absorption spectra of **BD** (10<sup>-5</sup> M) in H<sub>2</sub>O/THF mixtures with different volume fractions of water.

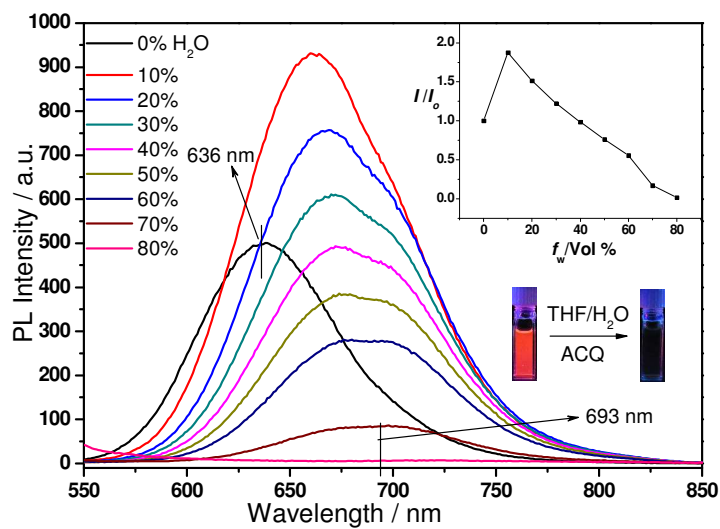

**Figure S7.** Emission spectra of **BD** ( $10^{-5}$  M) in H<sub>2</sub>O/THF mixtures with different volume fractions of water.  $\lambda_{\text{ex}} = 510$  nm. Insets: plot of relative PL intensity against water content ( $f_w$ ). Inset: Fluorescence image of BD (0 and 80% H<sub>2</sub>O) under 365 nm illumination.

#### 4. Solvent effect

**Table S1.** Optical properties of **ED** and **BD** in different solvents <sup>a</sup>

| Solvent   |                     | hexane | toluene | chloroform | tetrahydrofuran | ethanol |
|-----------|---------------------|--------|---------|------------|-----------------|---------|
| <b>ED</b> | $\lambda_{ab}$ [nm] | 436    | 436     | 432        | 431             | 423     |
|           | $\lambda_{em}$ [nm] | NA     | NA      | NA         | 594             | 594     |
| <b>BD</b> | $\lambda_{ab}$ [nm] | 475    | 493     | 507        | 505             | 513     |
|           | $\lambda_{em}$ [nm] | NA     | 584     | 611        | 636             | 660     |

[a] Abbreviations:  $\lambda_{ab}$  = absorption maximum,  $\lambda_{em}$  = emission maximum, Solvent polarity parameter =  $\{(\epsilon - 1)/(2\epsilon + 1) - (n^2 - 1)/(2n^2 + 1)\}$ , where  $\epsilon$  is the dielectric constant and  $n$  is the refractive index. The solvent used and the corresponding polarity parameters are: hexane ( $\sim 0$ ), toluene (0.014), chloroform (0.149), tetrahydrofuran (0.207), ethanol (0.288). Note: NA = not available (signal too weak to be accurately detected).

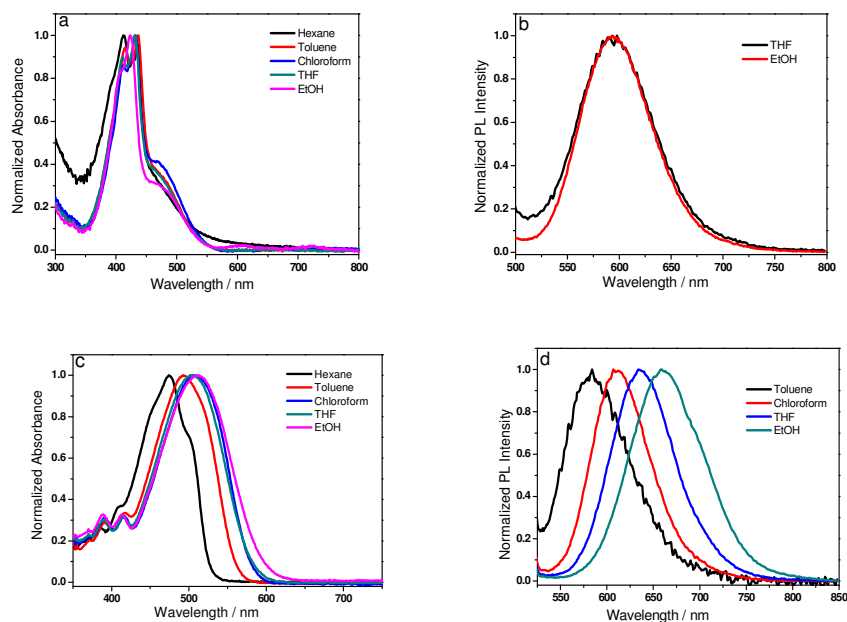

**Figure S8.** Normalized Absorption and emission spectra of **ED** (a, b) and **BD** (c, d) in dilute solvent with different polarities. The solvent used and the corresponding polarity parameters are: hexane (0), toluene (0.014), chloroform (0.149), tetrahydrofuran (0.207), ethanol (0.288).

## 5. The DFT calculation for BD and ED

The ground-state geometries of **ED** and **BD** have been optimized in the gas phase by DFT with the Gaussian09 package,<sup>[1]</sup> using the hybrid B3LYP functional and the standard 6-31G\* basis set.<sup>[2]</sup>

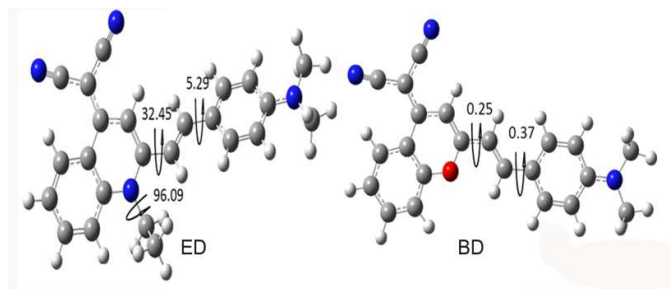

**Figure S9.** The optimized geometries of **BD** and **ED** for isolated state in gas phase at the B3LYP/6-31G\* level.

**Table S2.** The frontier orbitals of compounds **ED** and **BD** (isodensity=0.020 a.u.).

| ED                                                                                                        | BD                                                                                                         |
|-----------------------------------------------------------------------------------------------------------|------------------------------------------------------------------------------------------------------------|
| 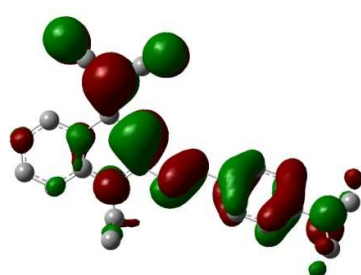 <p>HOMO (-5.40 eV)</p> |  <p>HOMO(-5.32 eV)</p>  |
|  <p>LUMO(-2.07 eV)</p> |  <p>LUMO(-2.51 eV)</p> |

[1] Gaussian 09, Revision A.02, M. J. Frisch, G. W. Trucks, H. B. Schlegel, G. E. Scuseria, M. A. Robb, J. R. Cheeseman, G. Scalmani, V. Barone, B. Mennucci, G. A. Petersson, H. Nakatsuji, M. Caricato, X. Li, H. P. Hratchian, A. F. Izmaylov, J. Bloino, G. Zheng, J. L. Sonnenberg, M. Hada, M. Ehara, K. Toyota, R. Fukuda, J. Hasegawa, M. Ishida, T. Nakajima, Y. Honda, O. Kitao, H. Nakai, T. Vreven, J. A. Montgomery, Jr., J. E. Peralta, F. Ogliaro, M. Bearpark, J. J. Heyd, E. Brothers, K. N. Kudin, V. N. Staroverov, R. Kobayashi, J. Normand, K. Raghavachari, A. Rendell, J. C. Burant, S. S. Iyengar, J. Tomasi, M. Cossi, N. Rega, J. M. Millam, M. Klene, J. E. Knox, J. B. Cross, V. Bakken, C. Adamo, J. Jaramillo, R. Gomperts, R. E. Stratmann, O. Yazyev, A. J. Austin, R. Cammi, C. Pomelli, J. W. Ochterski, R. L. Martin, K. Morokuma, V. G. Zakrzewski, G. A. Voth, P. Salvador, J. J. Dannenberg, S. Dapprich, A. D. Daniels, O. Farkas, J. B. Foresman, J. V. Ortiz, J. Cioslowski, and D. J. Fox, Gaussian, Inc., Wallingford CT, 2009.

[2] A. D. Becke, *J. Chem. Phys.* **1993**, 98, 1372–1377.



## 6. Crystallographic data

CCDC 881659 (**ED**) and CCDC 881660 (**BD**) contain the supplementary crystallographic data for this paper. These data can be obtained free of charge from the Cambridge Crystallographic Data Centre via [www.ccdc.cam.ac.uk/data\\_request/cif](http://www.ccdc.cam.ac.uk/data_request/cif).

**Table S3.** Crystal Data and Structure Refinements of **ED** and **BD**.

| Crystal                                             | <b>ED</b>                                                                                                                       | <b>BD</b>                                                                                                                          |
|-----------------------------------------------------|---------------------------------------------------------------------------------------------------------------------------------|------------------------------------------------------------------------------------------------------------------------------------|
| Empirical formula                                   | C <sub>24</sub> H <sub>22</sub> N <sub>4</sub>                                                                                  | C <sub>22</sub> H <sub>17</sub> N <sub>3</sub> O                                                                                   |
| Formula weight                                      | 366.46                                                                                                                          | 339.39                                                                                                                             |
| Temperature                                         | 293(2) K                                                                                                                        | 293(2) K                                                                                                                           |
| Wavelength                                          | 0.71073 Å                                                                                                                       | 0.71073 Å                                                                                                                          |
| Crystal system                                      | Monoclinic                                                                                                                      | Monoclinic                                                                                                                         |
| Space group                                         | <i>P</i> 2(1)/ <i>c</i>                                                                                                         | <i>P</i> 2(1)/ <i>c</i>                                                                                                            |
| Unit cell dimensions                                | <i>a</i> = 15.856(2) Å <i>α</i> = 90°<br><i>b</i> = 16.169(2) Å <i>β</i> = 96.660(3)°<br><i>c</i> = 7.8214(11) Å <i>γ</i> = 90° | <i>a</i> = 14.7186(12) Å <i>α</i> = 90°<br><i>b</i> = 15.3159(11) Å <i>β</i> = 93.723(2)°<br><i>c</i> = 7.8609(6) Å <i>γ</i> = 90° |
| Volume                                              | 1991.7(5) Å <sup>3</sup>                                                                                                        | 1768.3(2) Å <sup>3</sup>                                                                                                           |
| <i>Z</i>                                            | 4                                                                                                                               | 4                                                                                                                                  |
| Calculated density                                  | 1.222 g/cm <sup>3</sup>                                                                                                         | 1.275 g/cm <sup>3</sup>                                                                                                            |
| Absorption coefficient                              | 0.074 mm <sup>-1</sup>                                                                                                          | 0.080 mm <sup>-1</sup>                                                                                                             |
| <i>F</i> (000)                                      | 776                                                                                                                             | 712                                                                                                                                |
| Crystal size                                        | 0.361 x 0.270 x 0.121 mm <sup>3</sup>                                                                                           | 0.356 x 0.228 x 0.200 mm <sup>3</sup>                                                                                              |
| Theta range for data collection                     | 1.81 to 25.50°                                                                                                                  | 1.92 to 26.00°                                                                                                                     |
| Index ranges                                        | -19 ≤ <i>h</i> ≤ 18<br>-15 ≤ <i>k</i> ≤ 19<br>-9 ≤ <i>l</i> ≤ 9                                                                 | -16 ≤ <i>h</i> ≤ 18<br>-9 ≤ <i>k</i> ≤ 9                                                                                           |
| Reflections collected / Unique                      | 10408 / 3705 [ <i>R</i> (int) = 0.0816]                                                                                         | 10687 / 3469 [ <i>R</i> (int) = 0.1209]                                                                                            |
| Completeness to theta = 25.50                       | 99.6 %                                                                                                                          | 100.0 %                                                                                                                            |
| Absorption correction                               | Empirical                                                                                                                       | Empirical                                                                                                                          |
| Max. and min. transmission                          | 1.00000 and 0.79776                                                                                                             | 1.0000 and 0.6948                                                                                                                  |
| Refinement method                                   | Full-matrix least-squares on <i>F</i> <sup>2</sup>                                                                              | Full-matrix least-squares on <i>F</i> <sup>2</sup>                                                                                 |
| Data / restraints / parameters                      | 3705 / 0 / 257                                                                                                                  | 3469 / 0 / 238                                                                                                                     |
| Goodness-of-fit on <i>F</i> <sup>2</sup>            | 0.846                                                                                                                           | 0.917                                                                                                                              |
| Final <i>R</i> indices [ <i>I</i> > 2σ( <i>I</i> )] | <i>R</i> <sub>1</sub> = 0.0445, <i>wR</i> <sub>2</sub> = 0.0771                                                                 | <i>R</i> <sub>1</sub> = 0.0583, <i>wR</i> <sub>2</sub> = 0.1486                                                                    |
| <i>R</i> indices (all data)                         | <i>R</i> <sub>1</sub> = 0.1068, <i>wR</i> <sub>2</sub> = 0.0918                                                                 | <i>R</i> <sub>1</sub> = 0.0839, <i>wR</i> <sub>2</sub> = 0.1593                                                                    |
| Extinction coefficient                              | 0.0035(3)                                                                                                                       | 0.0053(11)                                                                                                                         |
| Largest diff. peak and hole                         | 0.105 and -0.121 e. Å <sup>-3</sup>                                                                                             | 0.214 and -0.265 e. Å <sup>-3</sup>                                                                                                |

## 7. Stimuli-responsive section

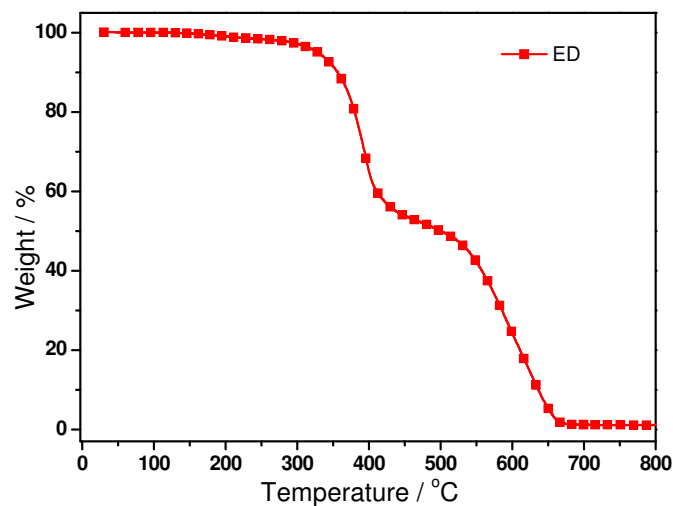

**Figure S10.** The TGA curves of pristine powder of **ED** under nitrogen (Scan rate: 10 °C min<sup>-1</sup>)

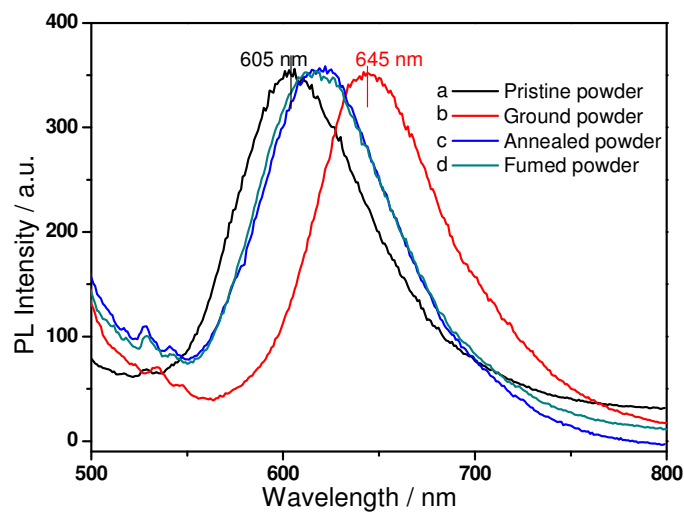

**Figure S11.** PL spectra of **ED**: (a) pristine powder, (b) ground powder (grinding pristine powder with pestle), (c) annealed powder (ground powder annealed at 100 °C for 5 min), (d) fumed powder (reground powder in dichloromethane vapor for 5 min).

## 8. Cell imaging

**Cell culture:** A human nasopharyngeal epidermal carcinoma cell line (KB cell) was provided by the Institute of Biochemistry and Cell Biology, SIBS, CAS (China). Cells were grown at 37 °C and with 5% CO<sub>2</sub> in Roswell Park Memorial Institute medium (RPMI) 1640 supplemented with 10% fetal bovine serum (FBS). Cells ( $5 \times 10^8 \text{ L}^{-1}$ ) were plated on 18 mm glass cover slips, and allowed to adhere for 24 h. The cells were washed three times with PBS buffer, and the medium was replaced with PBS buffer before imaging.

**Microscopy and imaging methods:** Confocal luminescence imaging of cells was performed with a modified Olympus FV1000 laser-scanning microscope. A 60 × oil-immersion objective lens was used. Excitation was carried out with a semiconductor laser at  $\lambda = 405 \text{ nm}$ , and emission was collected in the range  $\lambda = 565 - 665 \text{ nm}$ , including the maximum emission wavelength of **ED**. KB cells were incubated with a PBS solution of **ED** (10  $\mu\text{M}$ ) for dye loading for 0.5 h at 37°C. The stained cells were washed three times with PBS buffer. Then the treated cells were imaged by fluorescence microscopy.

## 9. Characterization of compounds ED and BD

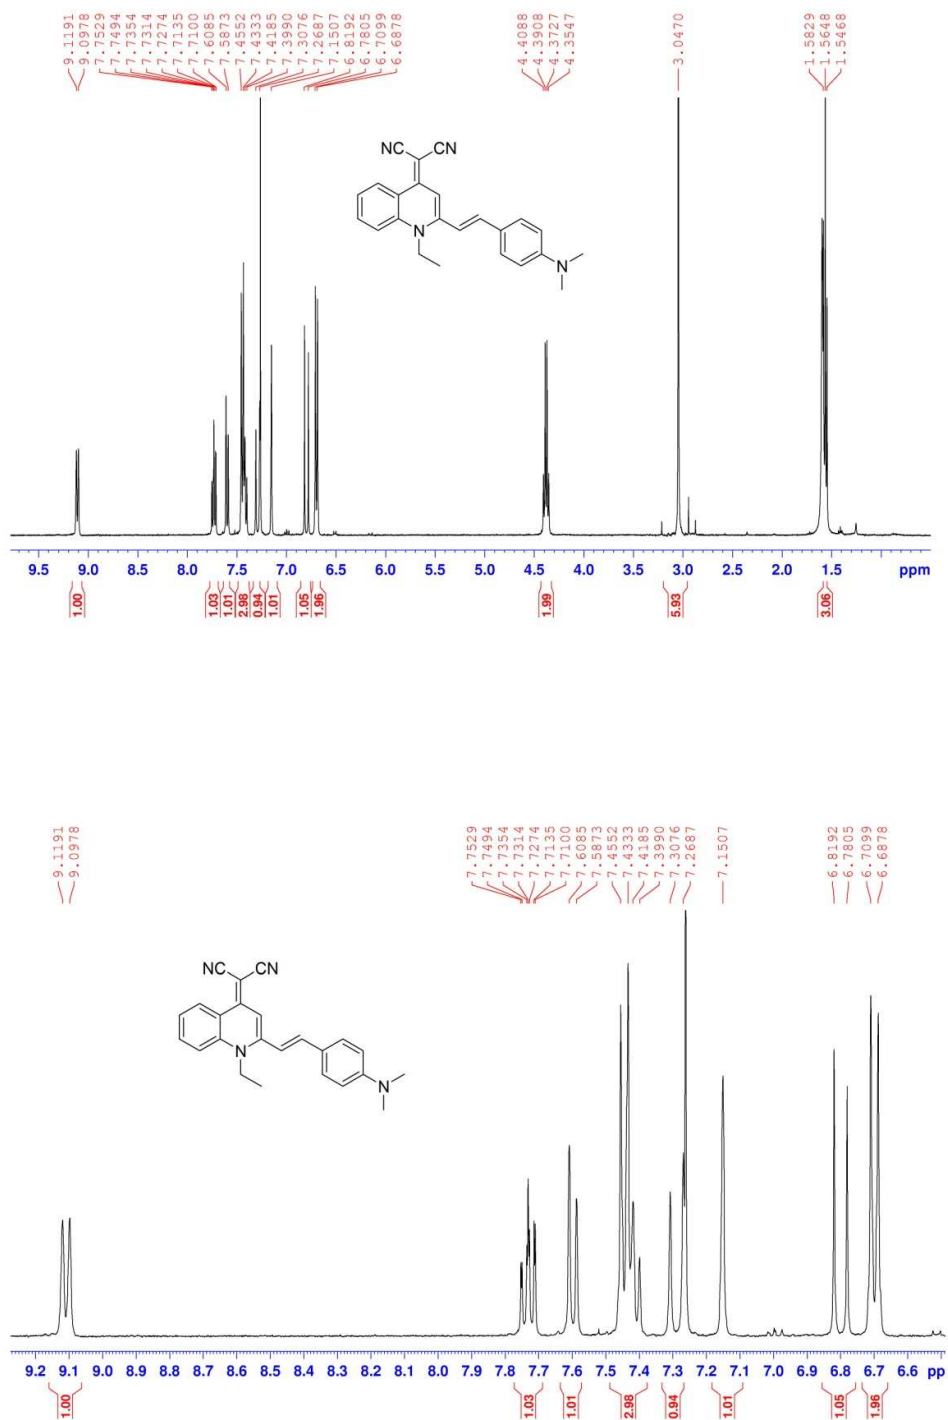

**Figure S12.**  $^1\text{H}$  NMR spectra of compound **ED** in  $\text{CDCl}_3$

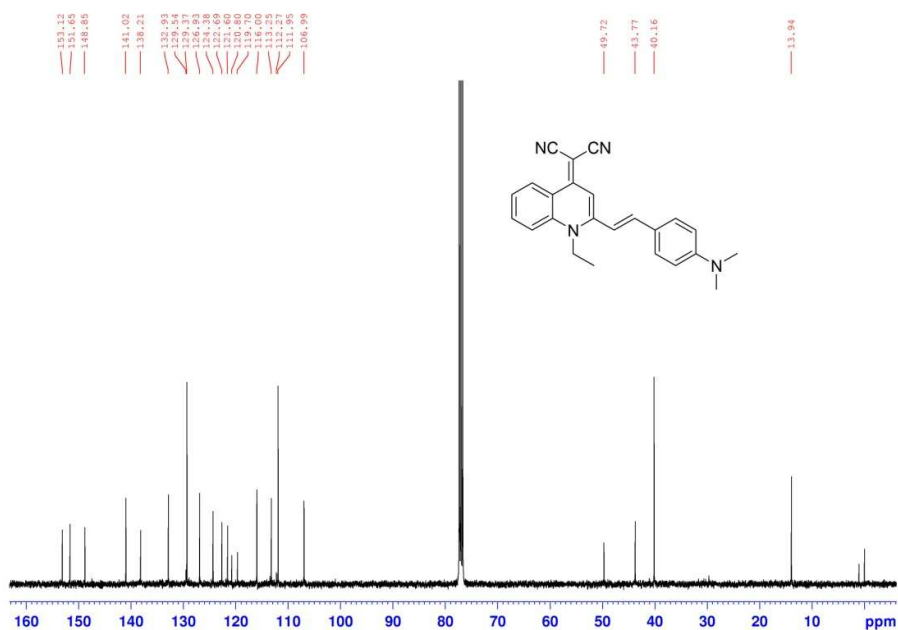

Figure S13. <sup>13</sup>C NMR spectra of compound ED in CDCl<sub>3</sub>

#### Elemental Composition Report

Page 1

##### Single Mass Analysis

Tolerance = 50.0 mDa / DBE: min = -1.5, max = 100.0

Element prediction: Off

Number of isotope peaks used for i-FIT = 2

Monoisotopic Mass, Even Electron Ions

53 formula(e) evaluated with 10 results within limits (up to 1 closest results for each mass)

Elements Used:

C: 0-25 H: 0-25 N: 0-43

WH-ZHU

ECUST Institute of Fine Chem

ZWH-SCX-101 7 (0.299) Cm (2.44)

14-Mar-2012

18:59:50

1: TOF MS ES+

5.30e+004

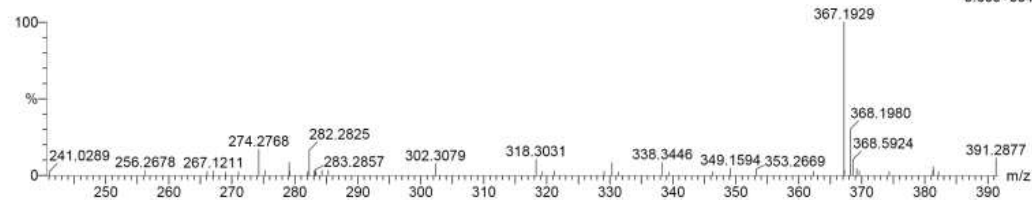

Minimum: -1.5  
Maximum: 100.0

| Mass     | Calc. Mass | mDa | PPM | DBE  | i-FIT | i-FIT (Norm) | Formula                                        |
|----------|------------|-----|-----|------|-------|--------------|------------------------------------------------|
| 367.1929 | 367.1923   | 0.6 | 1.6 | 15.5 | 46.9  | 0.0          | C <sub>24</sub> H <sub>23</sub> N <sub>4</sub> |

Figure S14. HR mass spectra of ED

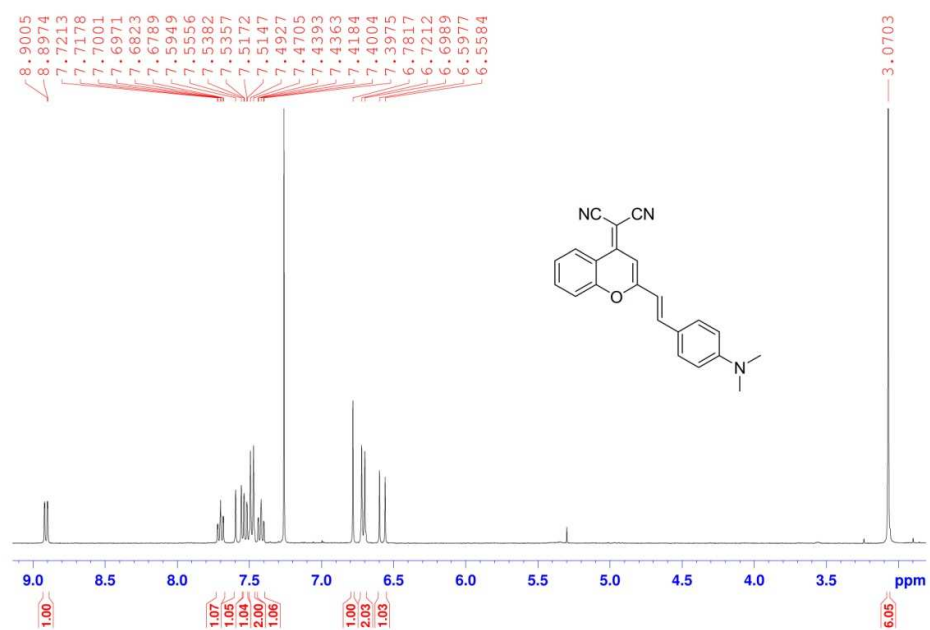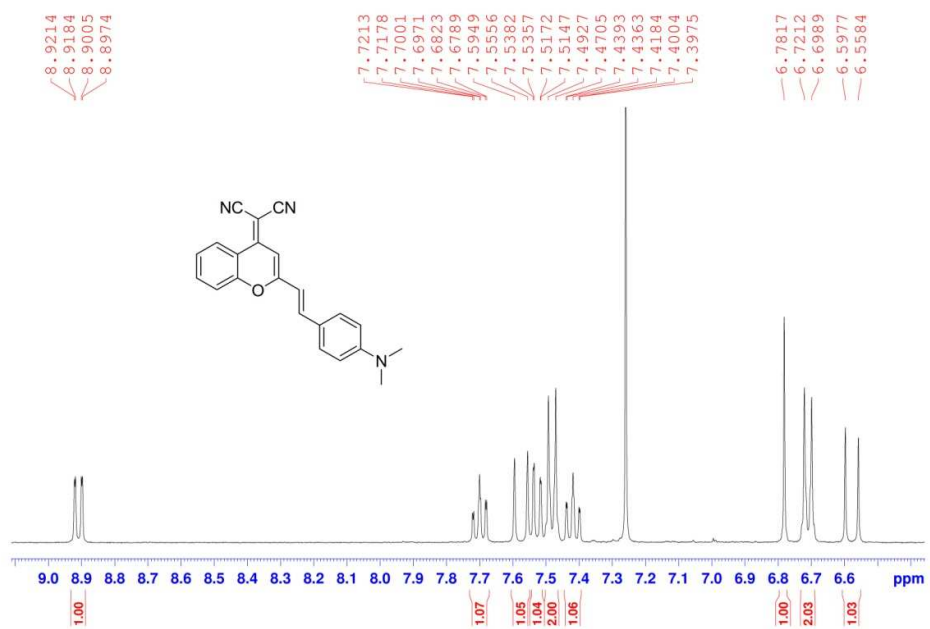

**Figure S15.** <sup>1</sup>H NMR spectra of compound **BD** in CDCl<sub>3</sub>

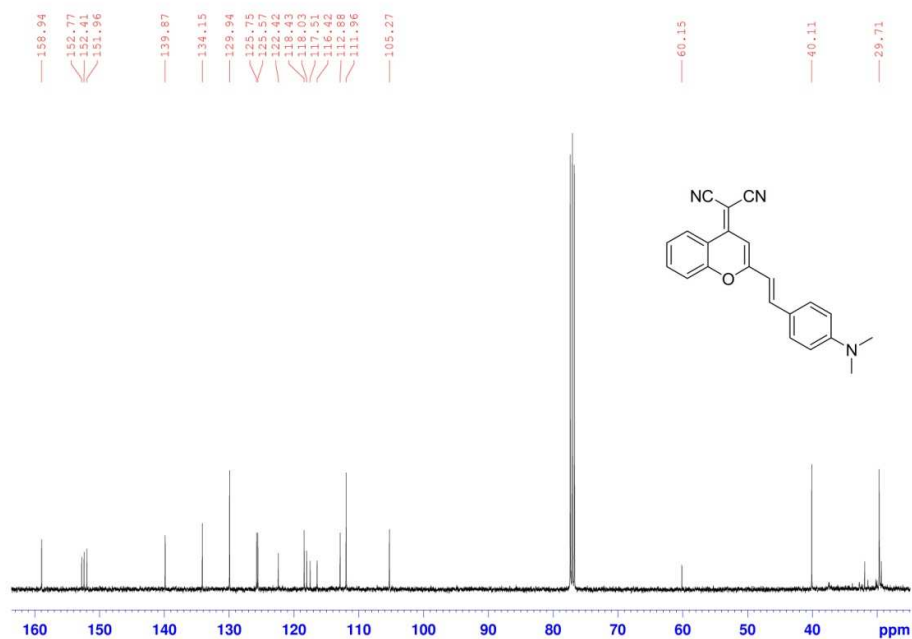

**Figure S16.** <sup>13</sup>C NMR spectra of compound **BD** in CDCl<sub>3</sub>

#### Elemental Composition Report

Page 1

##### Single Mass Analysis

Tolerance = 3.0 mDa / DBE: min = -1.5, max = 50.0

Element prediction: Off

Number of isotope peaks used for i-FIT = 4

Monoisotopic Mass, Even Electron Ions

95 formula(e) evaluated with 1 results within limits (up to 1 best isotopic matches for each mass)

Elements Used:

C: 20-32 H: 1-50 N: 0-4 O: 0-8

ZHU-WH

LCT Premier

Key Lab for Advanced Materials --- ECUST

1: TOF MS ES+

4.56e+004

ZWH-SCX-002 44 (1.658) Cm (40:48)

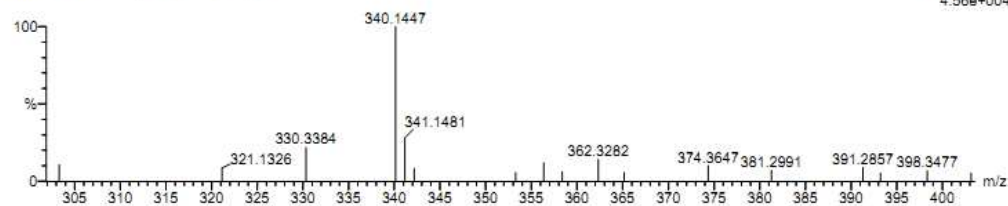

Minimum: -1.5  
Maximum: 50.0

| Mass     | Calc. Mass | mDa  | PPM  | DBE  | i-FIT | i-FIT (Norm) | Formula      |
|----------|------------|------|------|------|-------|--------------|--------------|
| 340.1447 | 340.1450   | -0.3 | -0.9 | 15.5 | 39.1  | 0.0          | C22 H18 N3 O |

**Figure S17.** HR mass spectra of **BD**
